# Supplementary material for: EYA2 suppresses the progression of hepatocellular carcinoma via SOCS3-mediated blockade of JAK/STAT signaling
Source: PubMed Central journal article supplement (PMC8157759; doi:10.1186/s12943-021-01377-9), 2021-05-27

# Figure S1

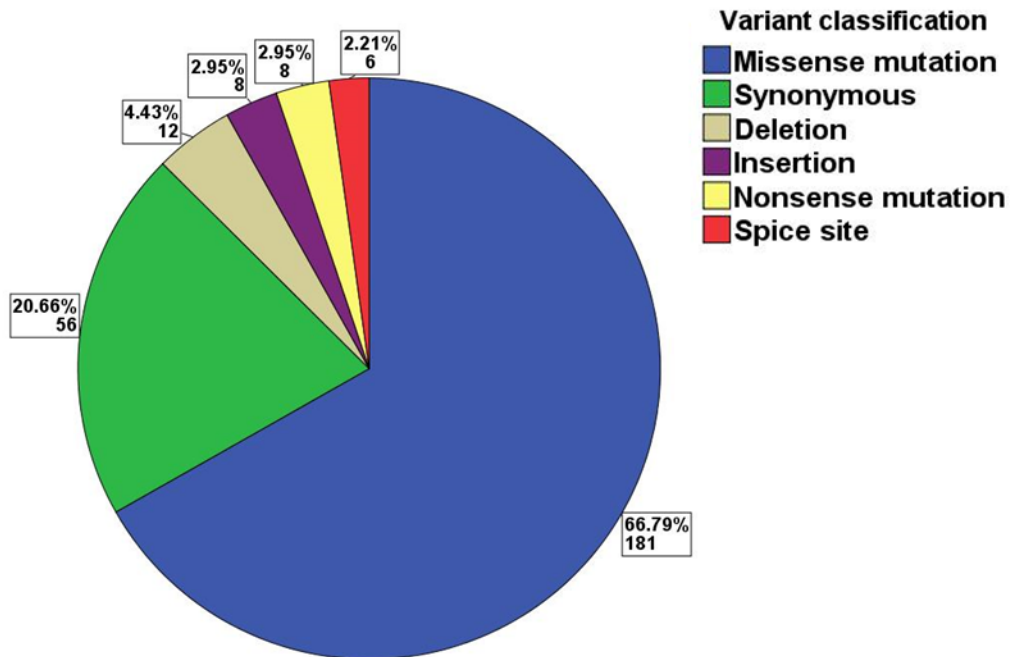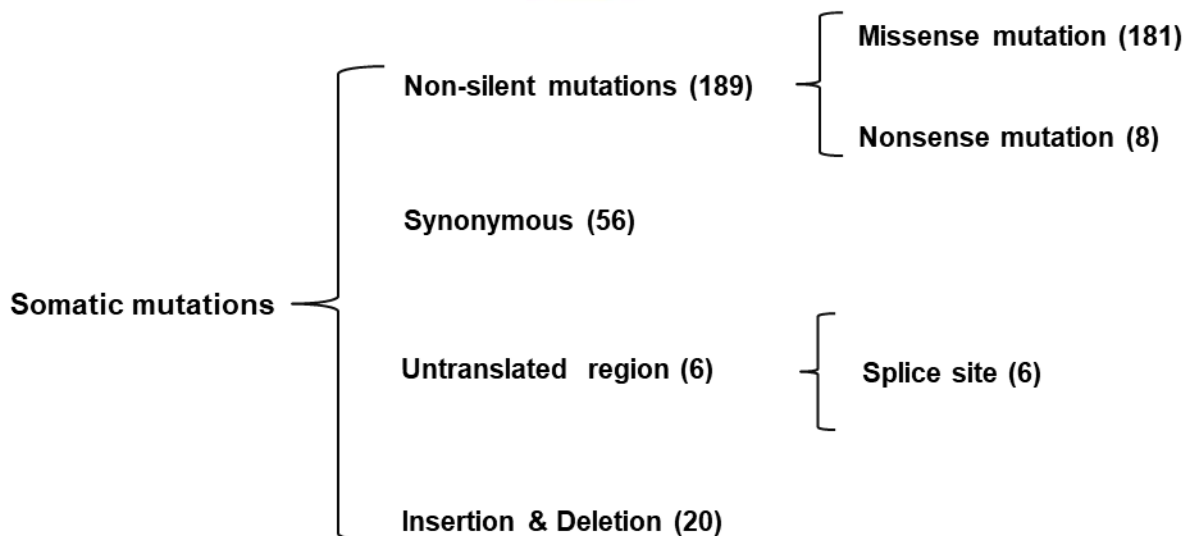

# Figure S2

## GPR98

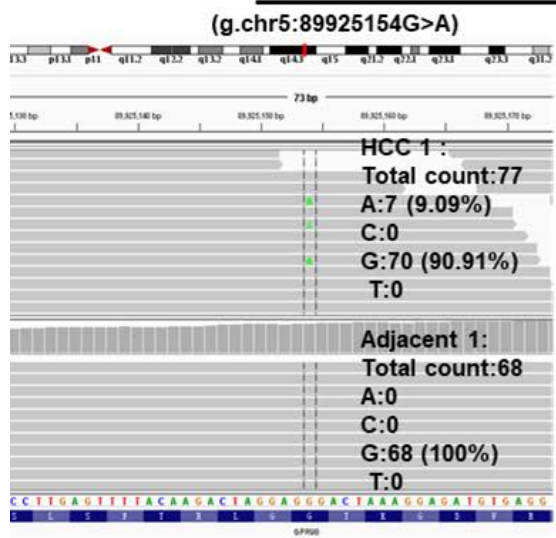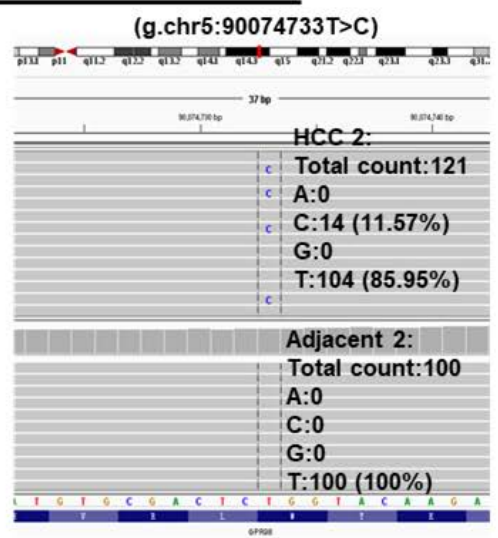

## EYA2

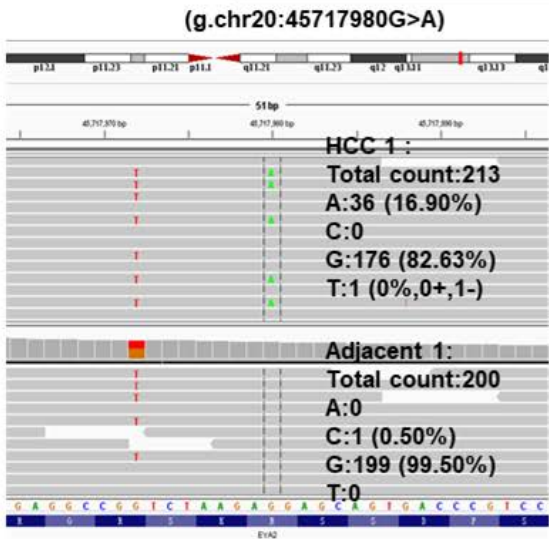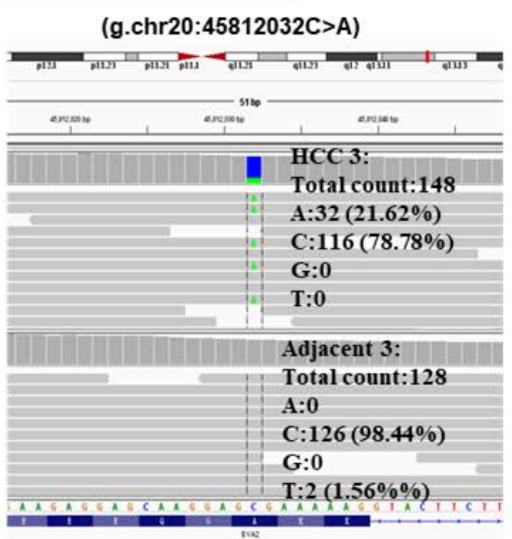

## UBE2S

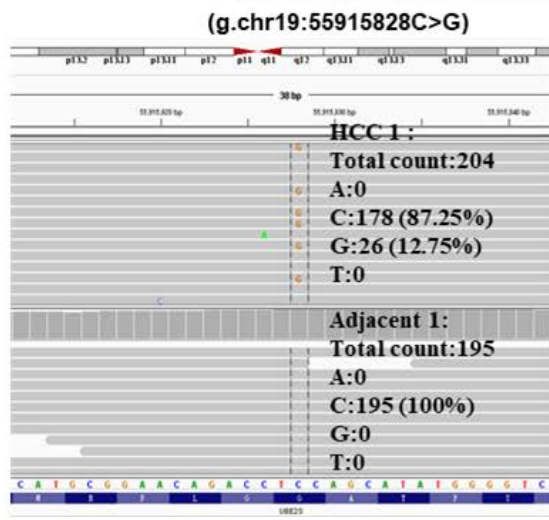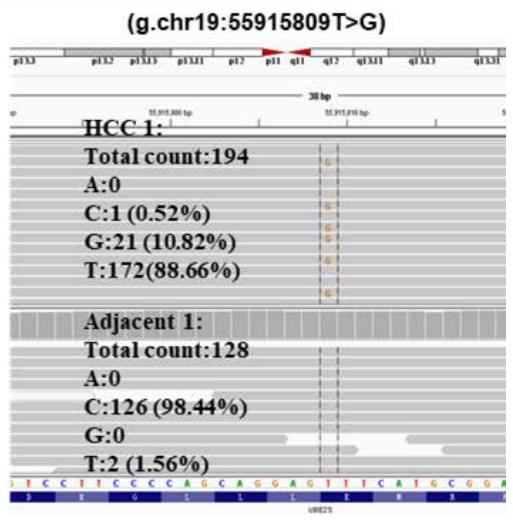

# Figure S3

**A**

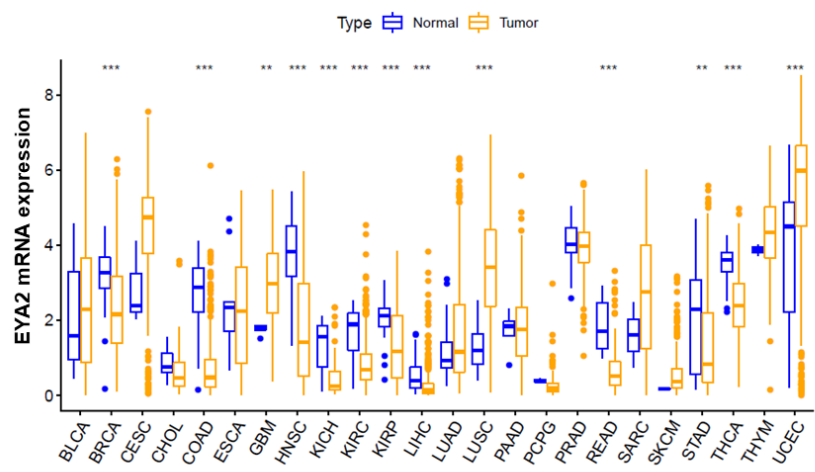

**B**

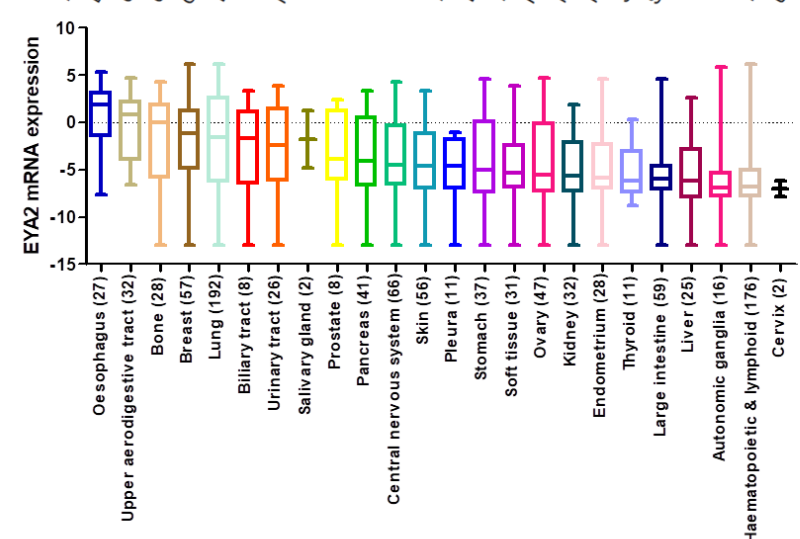

**C**

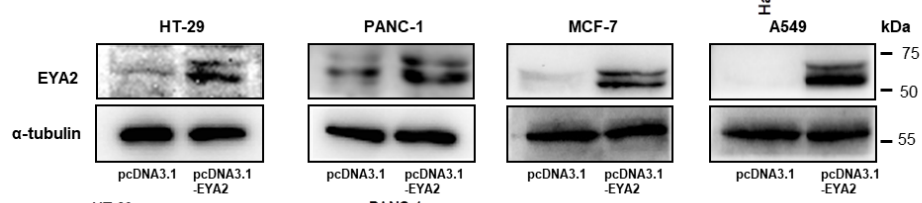

**D**

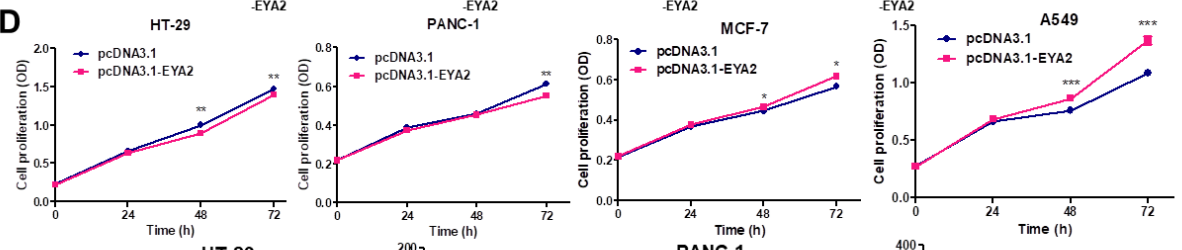

**E**

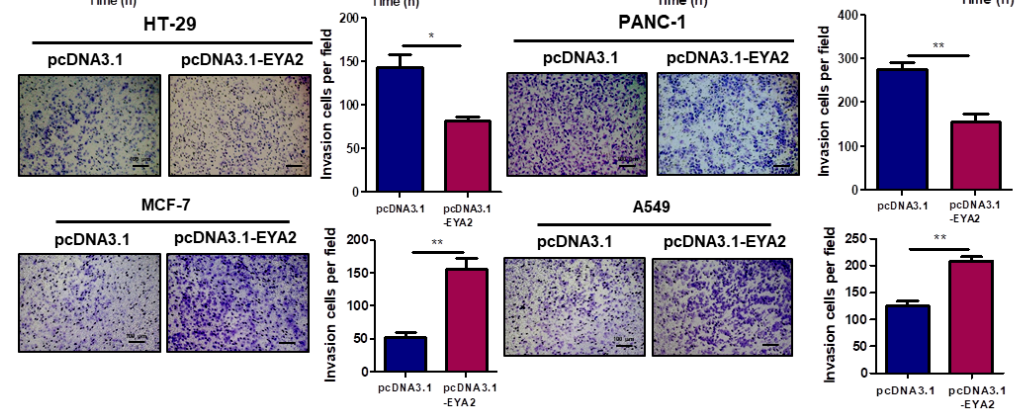

# Figure S4

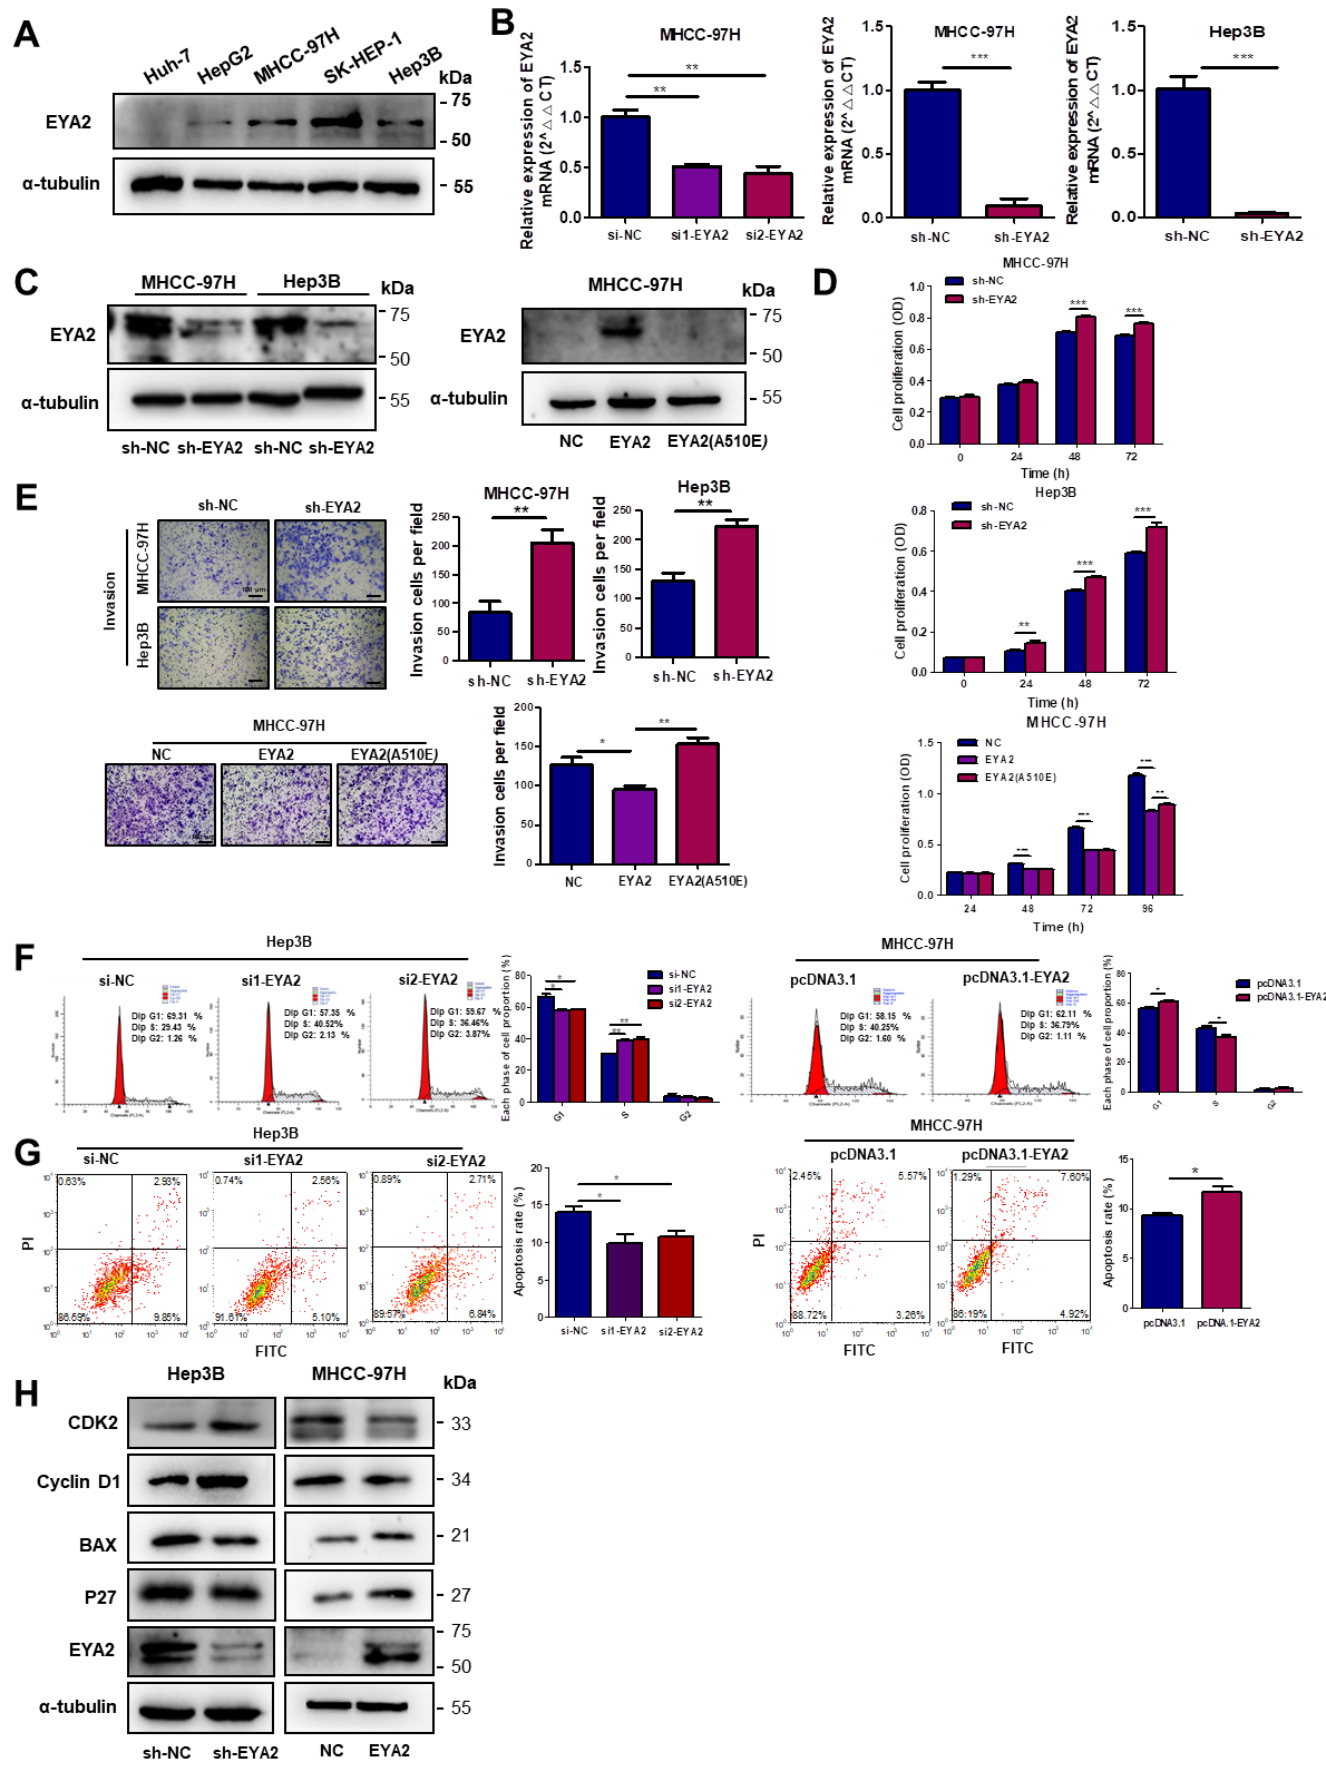

**Figure S5**

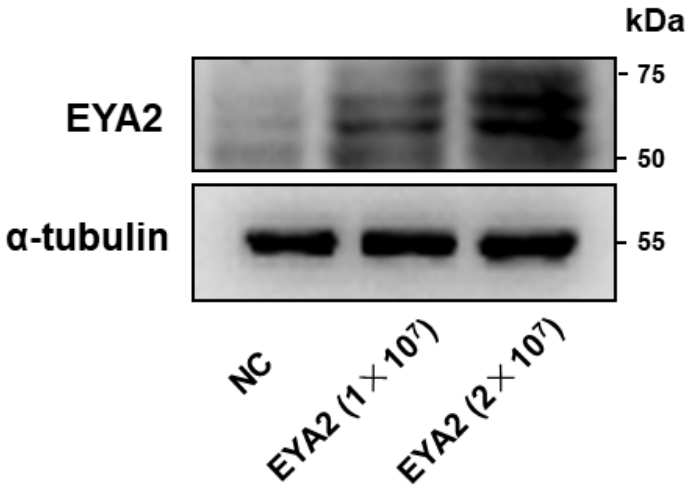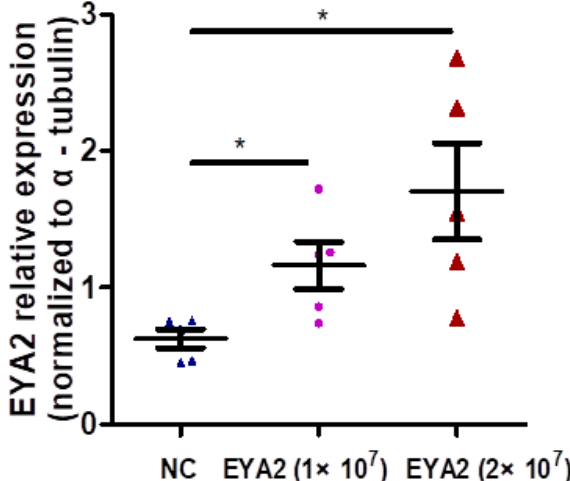

# Figure S6

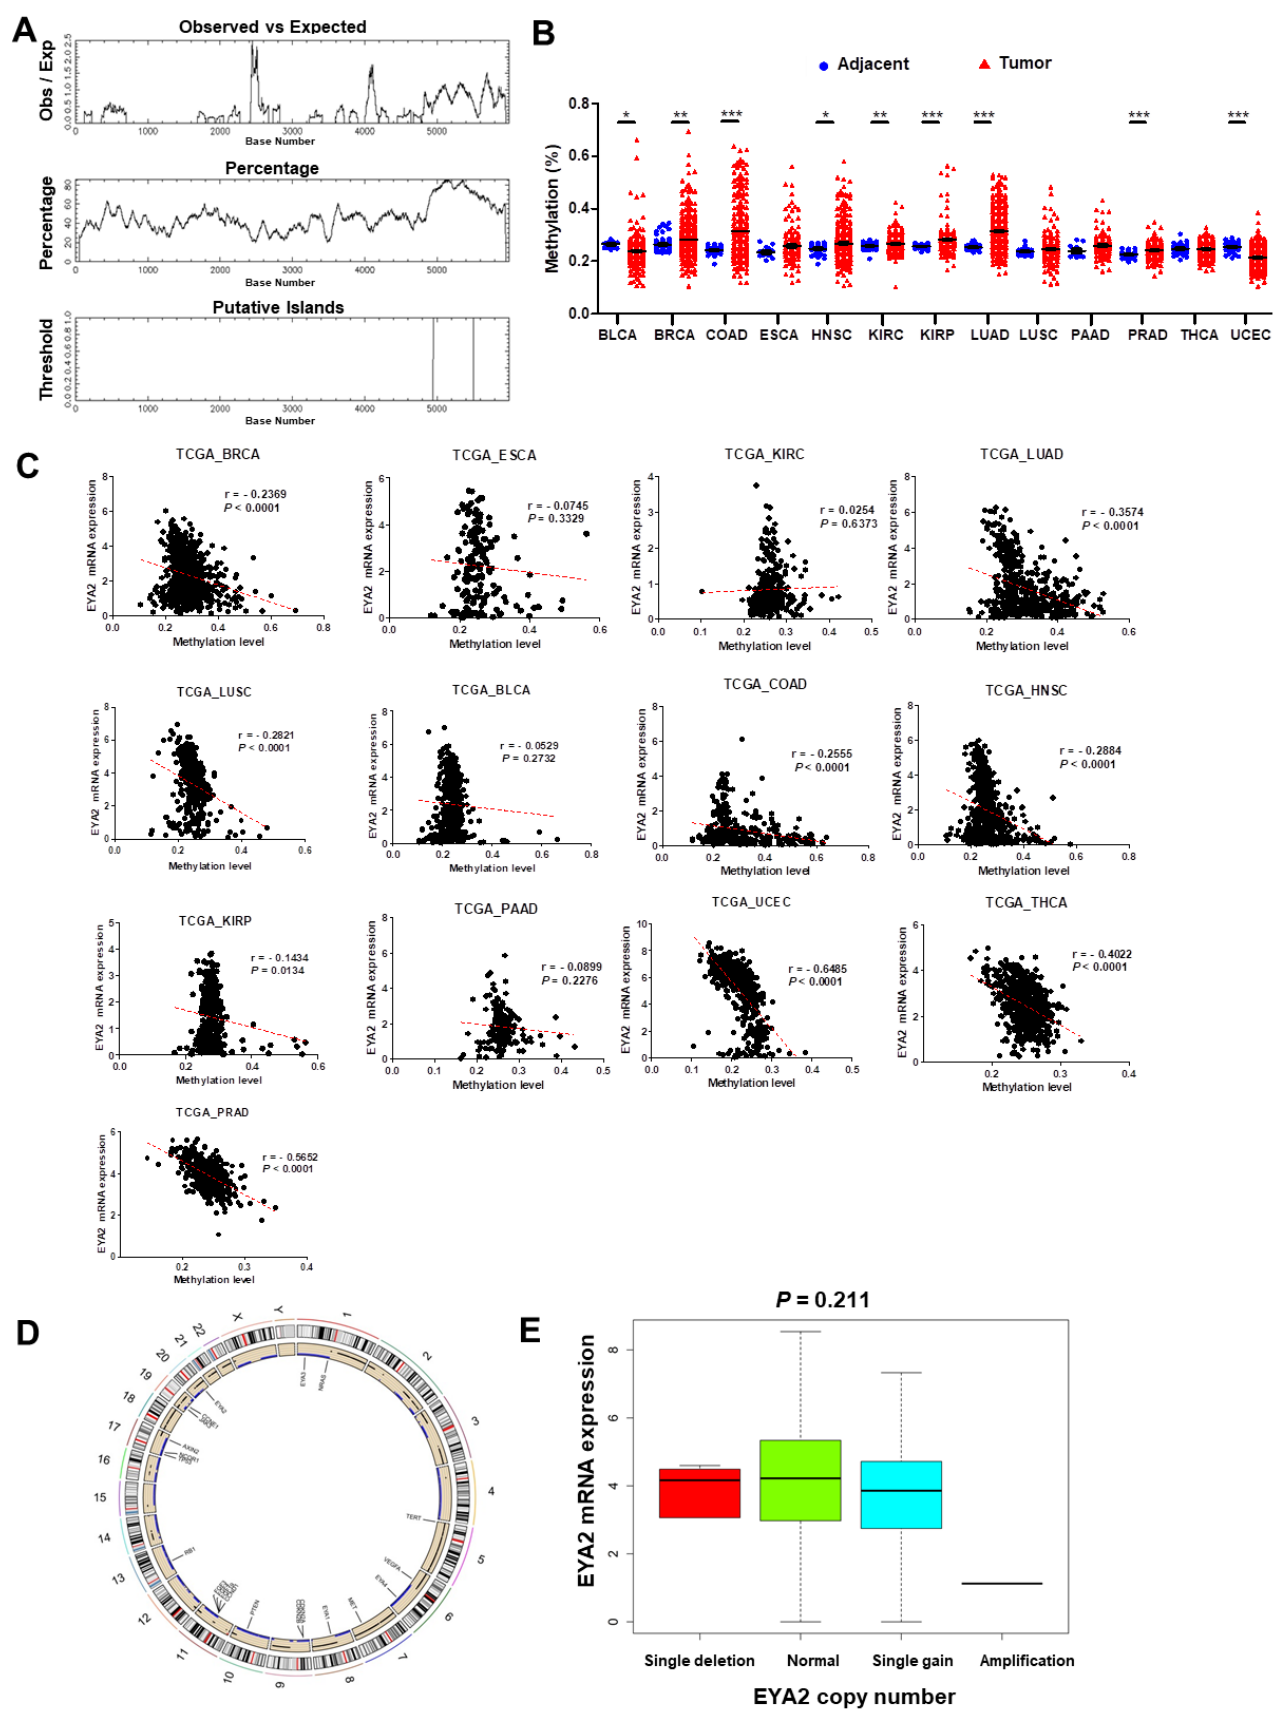

# Figure S7

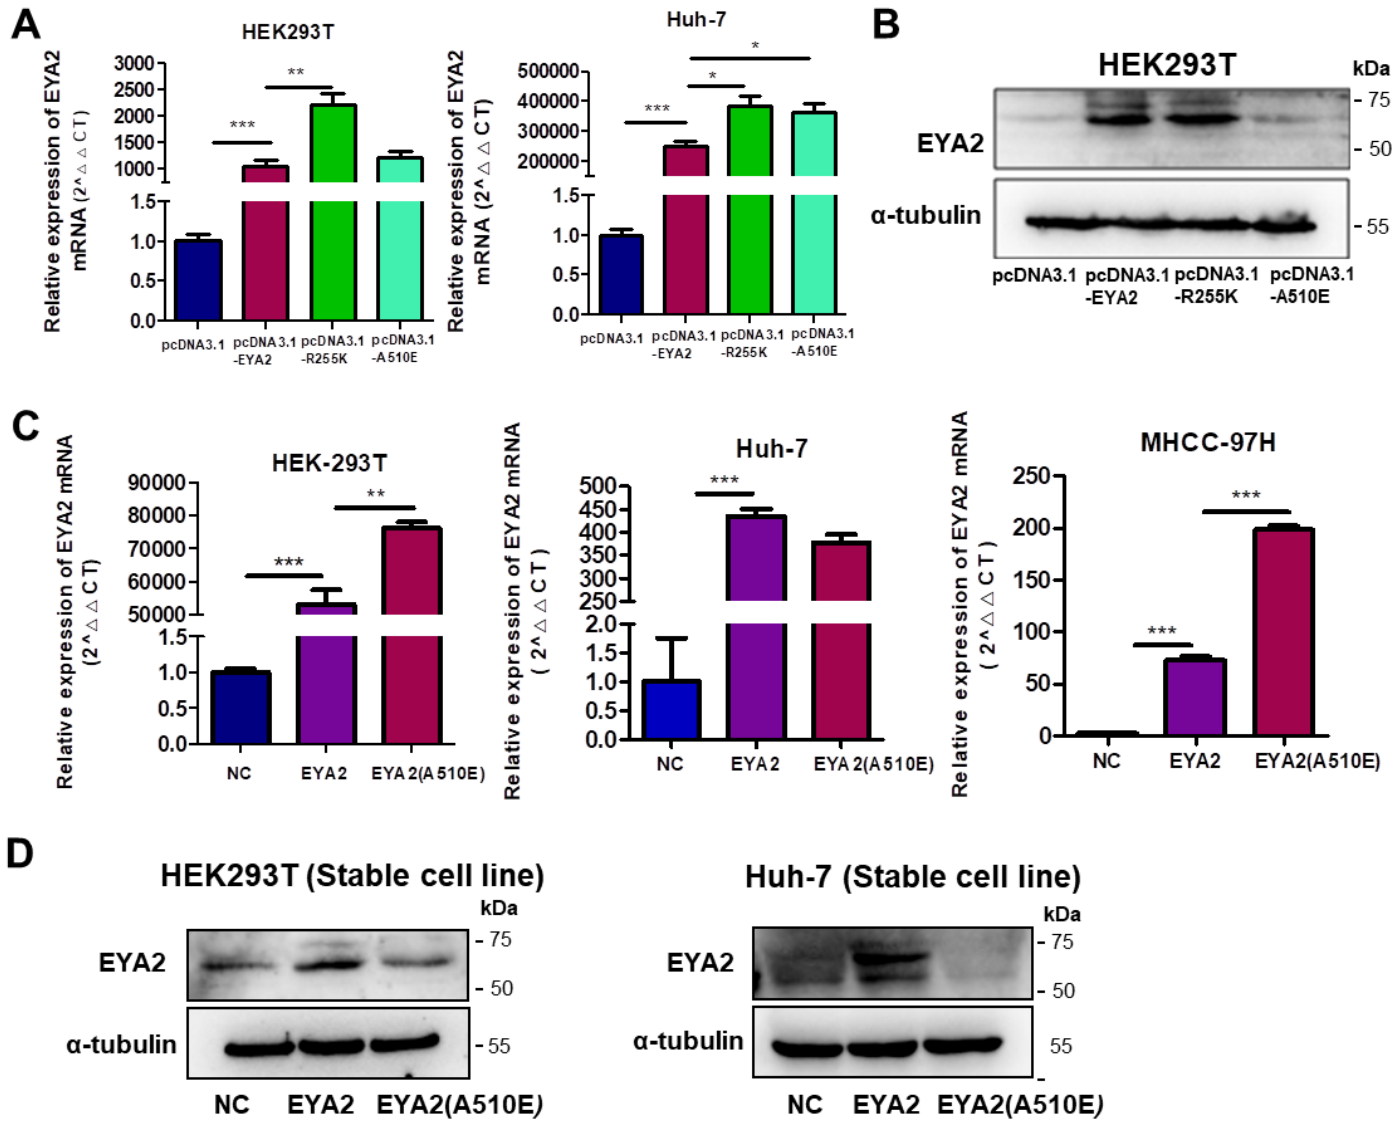



**Figure S8**

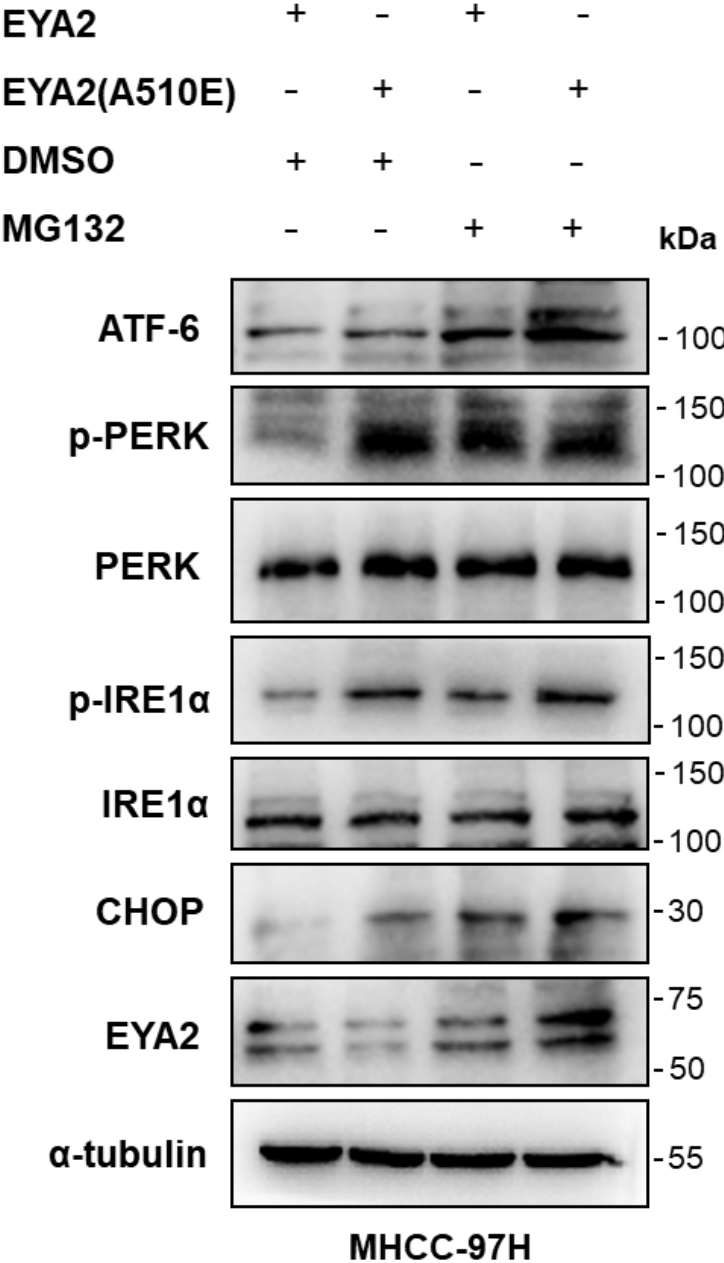



# Figure S9

**A**

**Huh-7**

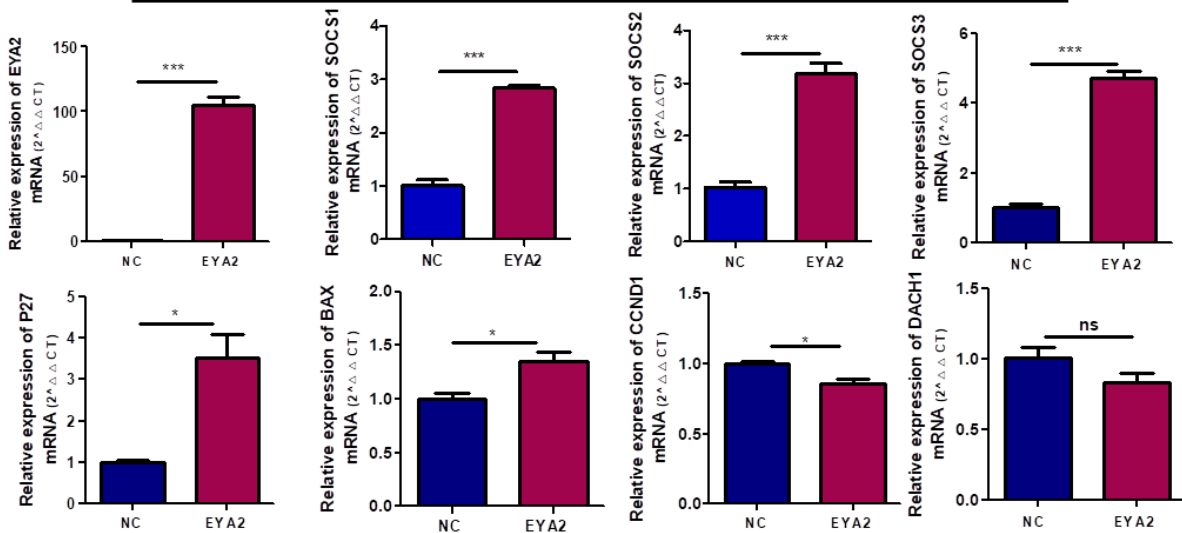

**B**

**GSE22058**

**D**

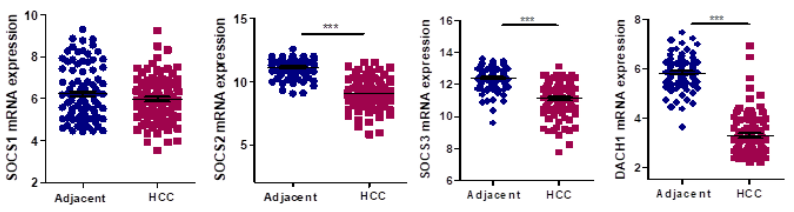

**GSE14520**

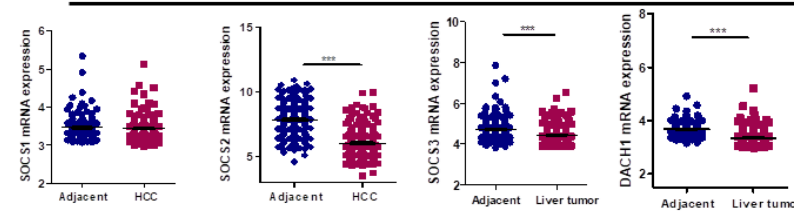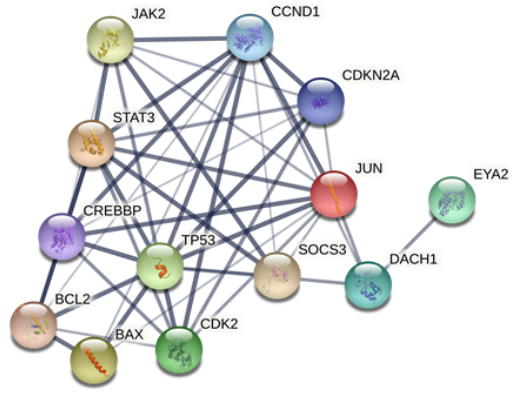

**C**

**GSE22058**

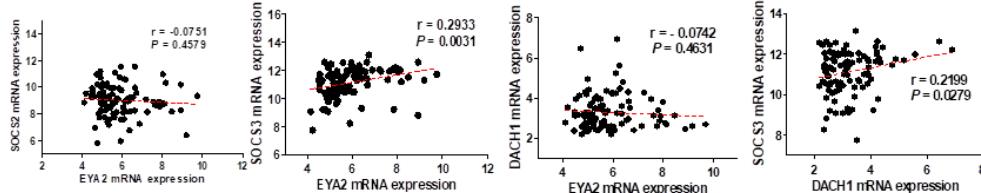

**GSE14520**

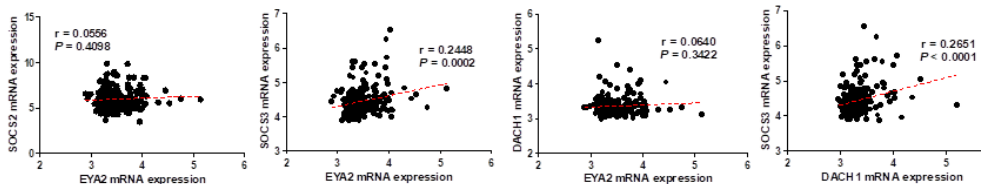

**Figure S10**

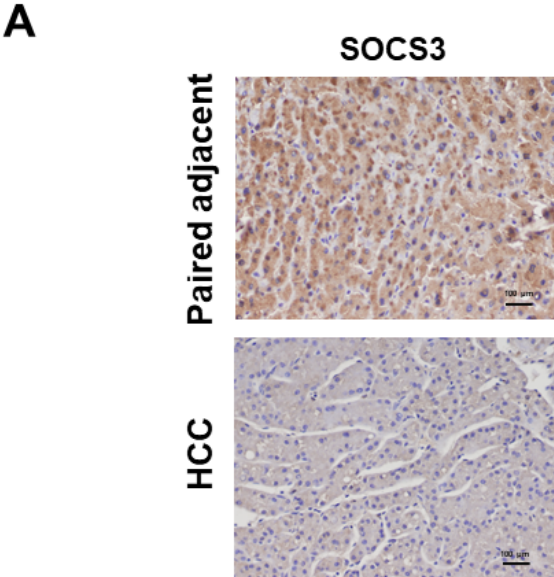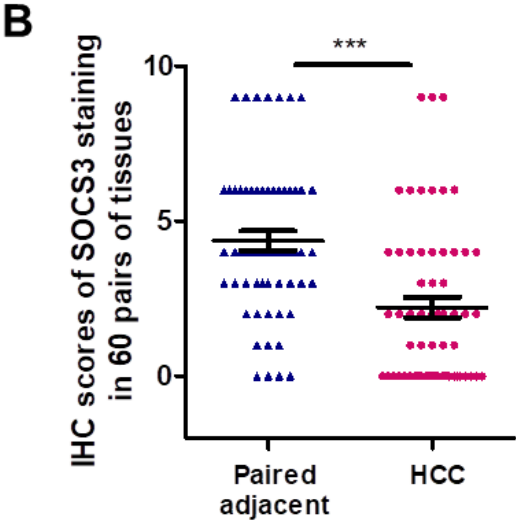

**C**

|              | EYA2      |           |           | <i>r</i>     | <i>P</i>     |
|--------------|-----------|-----------|-----------|--------------|--------------|
|              | Low       | High      | Total     |              |              |
| <b>SOCS3</b> |           |           |           | <b>0.386</b> | <b>0.002</b> |
| Low          | 33        | 9         | 42        |              |              |
| High         | 7         | 11        | 18        |              |              |
| <b>Total</b> | <b>40</b> | <b>20</b> | <b>60</b> |              |              |

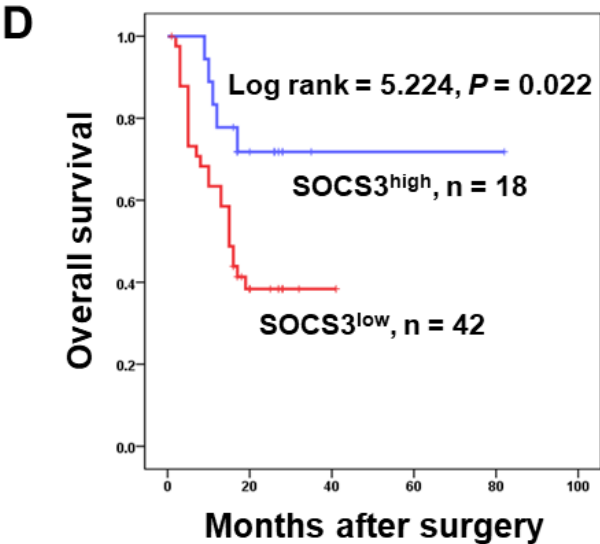

# Figure S11

**A**

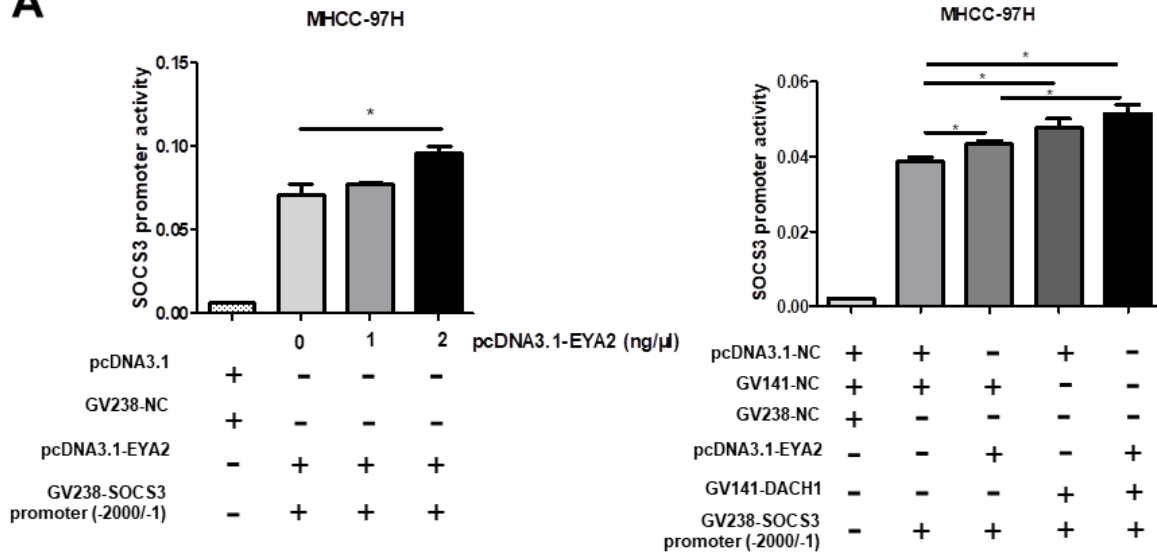

**B**

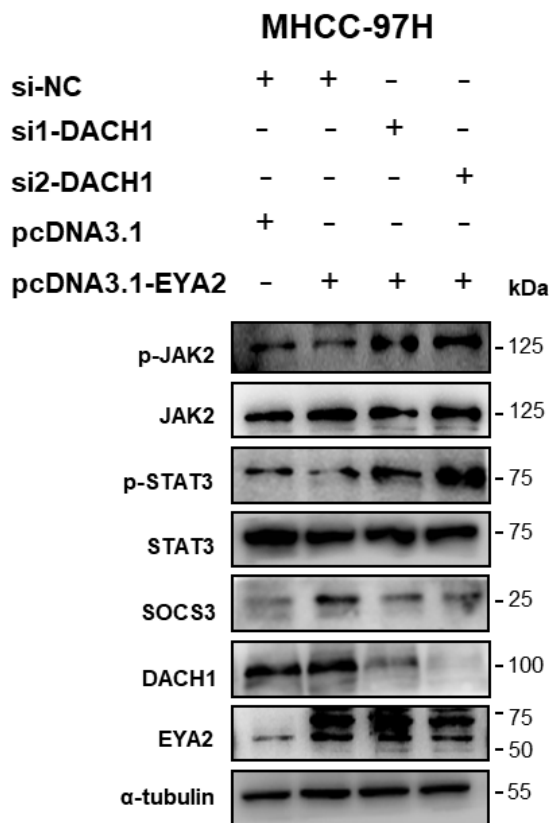

**C**

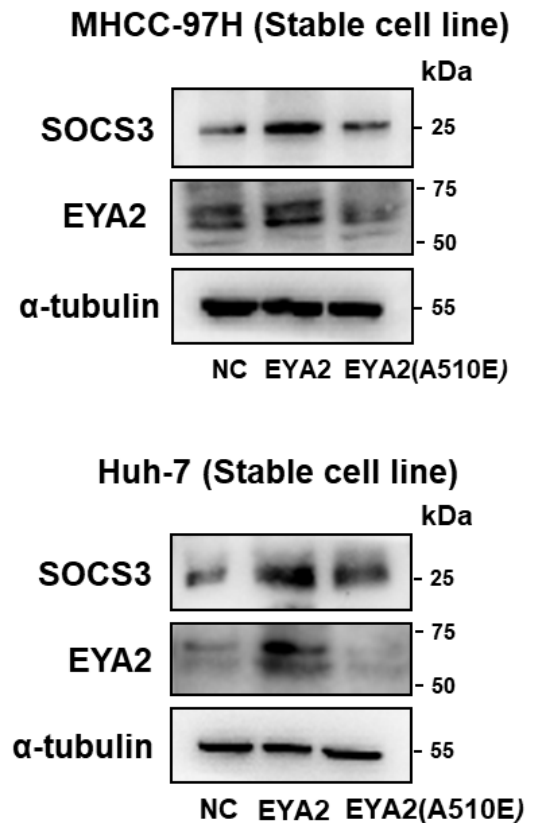

# Figure S12

## A

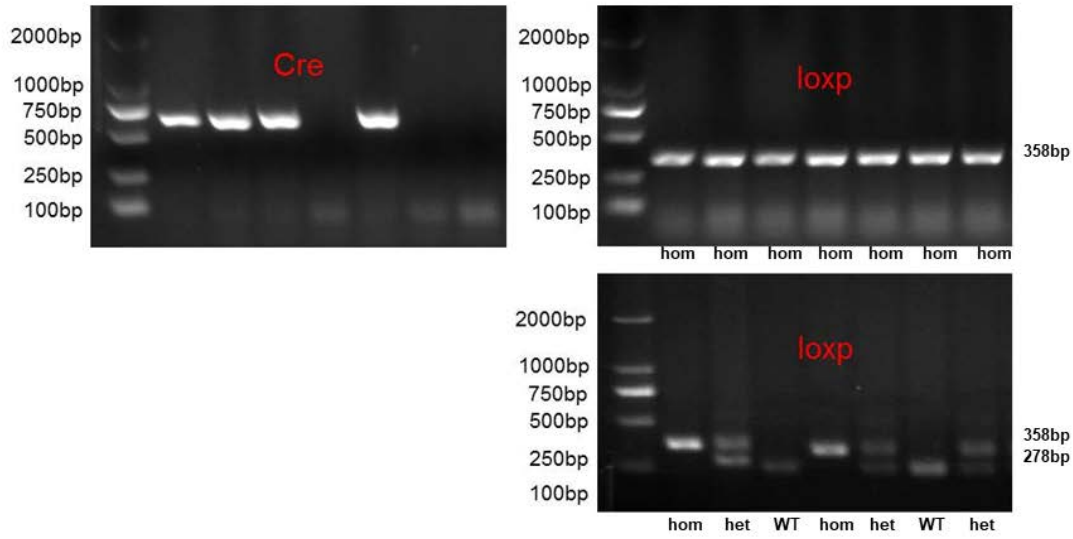

## B

Non-induced group (M11)

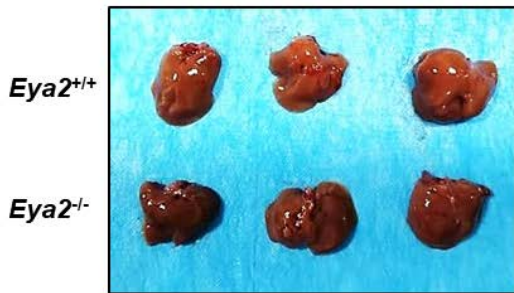

## C

Non-induced group (M11)

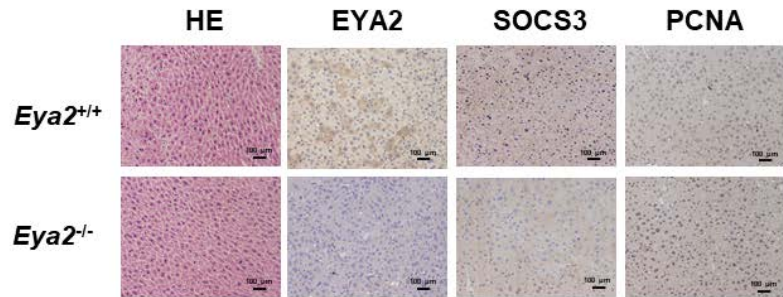

Figure S13

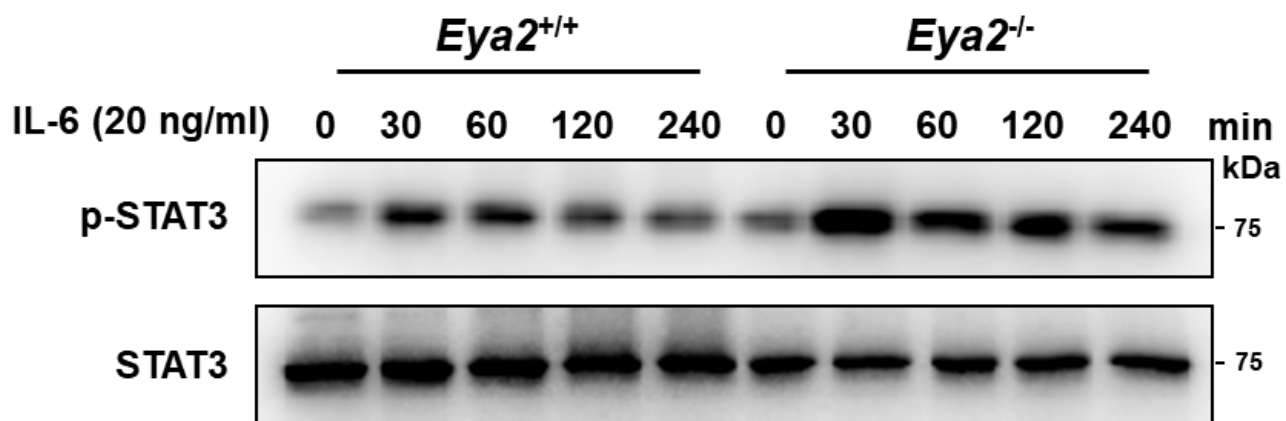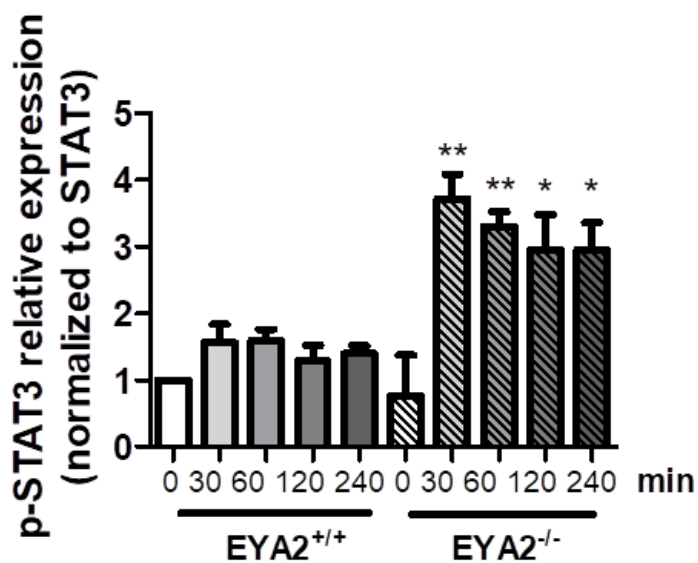

Supplement: 12943_2021_1377_MOESM3_ESM.pdf [file 12943_2021_1377_MOESM3_ESM.pdf]
